# Supplementary material for: Paradoxical Anxiety Level Reduction in Animal Chronic Stress: A Unique Role of Hippocampus Neurobiology
Source: MDPI journal article supplement (doi:10.3390/ijms23169151), 2022-08-15
Supplement: s1 [file s1]

## Supplementary Materials

**Table S1.** Individual metabolite levels (expressed as a percentage of the total amount of all metabolites) in hippocampus of PS exposed rats.

| Metabolite ratios in hippocampus (%) | Control (n = 7) | PS (n = 18)   | High Anxiety (n = 7) | Low Anxiety (n = 11) |
|--------------------------------------|-----------------|---------------|----------------------|----------------------|
| <b>NAA</b>                           | 18.8 ± 2.75     | 15.85 ± 2.73* | 14.89 ± 2.84*        | 16.46 ± 2.6*         |
| <b>GABA</b>                          | 7.35 ± 3.25     | 6.71 ± 2.14   | 5.6 ± 1.36           | 7.61 ± 2.28          |
| <b>Ala</b>                           | 7.03 ± 3.65     | 5.82 ± 2.6    | 7.41 ± 0.77          | 5.35 ± 1.85          |
| <b>Ast</b>                           | 0.1 ± 0.02      | 0.09 ± 0.01   | 0.11 ± 0.04          | 0.081 ± 0.05         |
| <b>Cho</b>                           | 2.17 ± 0.85     | 1.88 ± 0.44   | 1.96 ± 0.45          | 1.78 ± 0.31          |
| <b>Cr + PCr</b>                      | 12.00 ± 1.19    | 10.00 ± 2.35  | 10.99 ± 0.55         | 9.78 ± 0.58          |
| <b>Glu + Gln</b>                     | 15.01 ± 4.66    | 13.59 ± 4.61  | 12.90 ± 1.47         | 14.43 ± 1.83         |
| <b>mIn</b>                           | 5.46 ± 1.64     | 3.95 ± 1.7    | 4.97 ± 1.11          | 3.11 ± 0.59          |
| <b>Tau</b>                           | 4.97 ± 1.45     | 4.17 ± 1.35   | 4.96 ± 0.52          | 3.66 ± 0.51          |
| <b>Gly</b>                           | 15.81 ± 6.78    | 19.10 ± 3.63  | 16.31 ± 2.5          | 21.85 ± 1.32         |
| <b>Lac</b>                           | 3.22 ± 1.45     | 4.44 ± 1.01   | 4.7 ± 0.83           | 4.26 ± 1.53          |
| <b>PEA</b>                           | 8.08 ± 3.12     | 14.79 ± 8.3*  | 13.14 ± 2.14         | 15.84 ± 1.74         |

- The data are shown as the means ± SD.

\* –  $p < 0.05$  significant differences in compared with control
